# Supplementary material for: Reading and writing of mRNA m6A modification orchestrate maternal-to-zygotic transition in mice
Source: Genome Biol. 2023 Apr 6;24:67. doi: 10.1186/s13059-023-02918-9 (PMC10080794; doi:10.1186/s13059-023-02918-9)
Supplement: Supplementary file 3 — Additional file 3: Table S2. Defined gene list, sgRNA sequence, crRNA sequence and primer sequence used for qRT-PCR. [file 13059_2023_2918_MOESM3_ESM.xlsx]

## Sheet: Maternal loss( 982 genes)
0610012G03Rik
1110038F14Rik
1190005I06Rik
1190007I07Rik
1600012H06Rik
1700021F05Rik
1810009A15Rik
2310061I04Rik
2610507B11Rik
2700049A03Rik
3110040N11Rik
3830406C13Rik
4930470P17Rik
4931428L18Rik
6330411D24Rik
A430005L14Rik
A630010A05Rik
A930018P22Rik
Aadat
Aasdhppt
Abcb4
Abcg1
AC140267.1
Acin1
Acvr2b
Adam12
Adamts18
Adat2
Adhfe1
Adk
Adm2
Adss
Agpat2
Ahnak
Aig1
Aimp1
Aip
Ak2
Akap12
Akap7
Alad
Aldh2
Alkbh7
Amotl1
Anapc15
Anapc7
Ankmy1
Ankrd37
Ankrd66
Anks4b
Ap2s1
Apex1
Apod
Appl1
Araf
Arfgap1
Arhgap24
Arhgap39
Arl8a
Arnt2
Asb8
Ascc1
Ash2l
Asnsd1
Asxl1
Asz1
Atad2
Atg5
Atic
Atp1a3
Atp23
Atp2b1
Atp2b4
Atrip
Axdnd1
Azi2
B230219D22Rik
B4galt2
B4galt4
Bag1
Bag4
Banf1
Bank1
Bbof1
Bcl6
Bfsp1
Brcc3
Brd9
Brf1
Btg2
Bud13
C330018D20Rik
C9orf72
Cachd1
Cacna2d3
Cage1
Calr
Caprin2
Capzb
Car9
Cast
Cbr1
Ccdc112
Ccdc127
Ccdc130
Ccdc148
Ccdc181
Ccdc201
Ccdc25
Ccdc28a
Ccdc3
Ccdc30
Ccdc66
Ccdc84
Ccdc91
Ccdc92
Ccdc93
Ccne2
Ccnf
Ccsap
Cct2
Cct5
Cd164l2
Cd209g
Cd5
Cd9
Cdc25a
Cdc25c
Cdc27
Cdk11b
Cdk17
Cdk5rap2
Cdk6
Cdkn1b
Ceacam2
Cebpz
Cenps
Cenpx
Cep131
Cep295
Cep41
Cep57
Cep63
Cep89
Cfap298
Cfap45
Cfl1
Cggbp1
Cgnl1
Chaf1a
Chmp2a
Chrnb4
Ciao2a
Ciao3
Cib1
Cip2a
Cir1
Cisd1
Ckap2l
Clasp1
Clcc1
Cldnd1
Clec12a
Clec2f
Clint1
Clpx
Clta
Clvs1
Cnbd2
Cnot4
Coa3
Coil
Col4a3bp
Commd8
Copb2
Cops5
Coro2a
Cox14
Cox7a2l
Cpa1
Cphx1
Cpne3
Cpne9
Cpvl
Cr1l
Crcp
Csrnp2
Ctnna3
Cul5
Cwc25
Cwf19l2
Cxcl13
Cyb561d2
Cyb5r3
Cycs
D11Wsu47e
D6Wsu163e
D8Ertd738e
Dab1
Dap3
Dcaf7
Dcp2
Dctn6
Ddit3
Ddrgk1
Ddx1
Ddx11
Ddx19a
Ddx21
Ddx23
Ddx24
Ddx25
Ddx42
Ddx52
Ddx58
Ddx6
Dennd6a
Derl3
Dhx8
Dicer1
Dip2b
Dis3
Dlgap5
Dmap1
Dmd
Dmrtc1b
Dnah8
Dnajb12
Dnajc11
Dnajc16
Dnajc2
Dnajc30
Dnajc7
Dnajc9
Dnmt1
Dock3
Dpm2
Dppa2
Dpysl3
Dram2
Drosha
Dusp22
Duxbl2
Dync1i2
Dyrk1a
Dzip1
E130308A19Rik
Efcab3
Egfl6
Ehf
Eif2b4
Eif2b5
Eif3g
Eif3j2
Eif3k
Eif5b
Elf2
Eloa
Elp2
Elp3
Elp5
Emp2
Emx2
Enox1
Enox2
Ensa
Epb41l4a
Ephb1
Epp13
Eps15l1
Erich5
Erlec1
Etf1
Etfb
Exoc3
F8a
Faap100
Faim
Fam104a
Fam151a
Fam161a
Fam192a
Fam210a
Fam217a
Fam222a
Fam98a
Fancc
Fank1
Fbp2
Fdft1
Fermt2
Fetub
Fgd6
Fgf10
Fhod3
Fis1
Fkbpl
Flacc1
Flot2
Fmnl3
Fndc3a
Foxj3
Ftsj1
Ftsj3
Gabra5
Gadd45gip1
Gak
Gal3st2c
Galm
Galnt3
Gas2l1
Gas8
Gata3
Gbx2
Gcc2
Gcfc2
Gch1
Gemin7
Get4
Gfra1
Gins2
Git1
Glmn
Glod4
Gltp
Glyr1
Gm10184
Gm11808
Gm12666
Gm16286
Gm20498
Gm21988
Gm21994
Gm27029
Gm30302
Gm32687
Gm37240
Gm43518
Gm4779
Gm49496
Gm5475
Gm8797
Gm9803
Gmps
Gnb1l
Gng5
Gnrh1
Gpalpp1
Gpbp1
Gpr89
Gps2
Gpx1
Gramd1c
Grb14
Gripap1
Grk2
Grm4
Gspt2
Gstp1
Gtf2a1l
Gtf2f1
Gtsf1
Gtsf2
Gucy1a2
H2-Aa
H2bc4
Haus6
Haus8
Hbb-bs
Hcfc1r1
Hddc2
Hdlbp
Heatr1
Heatr4
Hivep1
Hltf
Hmgb2
Hmmr
Hnrnpc
Hnrnpl
Hnrnpul1
Hs6st3
Hsp90b1
Hspa4
Hspa5
Hspb11
Hsph1
Htr1f
Htr5a
Ick
Ifit1bl2
Ift46
Ift52
Ift81
Igsf23
Il23r
Immt
Ino80b
Inpp5f
Ints12
Ints9
Ip6k2
Irf1
Itga10
Itm2a
Itpr2
Izumo1r
Jag1
Kansl3
Kbtbd3
Kcng2
Kcnk2
Kcnn2
Kdm2b
Kdm5b
Kdm6b
Kif13b
Kif21a
Klf13
Klhl14
Knop1
Kpna2
Kpnb1
Kremen1
Krt10
Ktn1
Lalba
Larp7
Letm2
Lhpp
Lig1
Lima1
Lmbrd2
Lmln
Lmo1
Lrp5
Lrrc6
Lrrc71
Lrrc8a
Lrrfip2
Lrriq1
Ltv1
Luc7l
Luc7l3
Ly6e
Lypd6b
Macrod2
Man1a
Map4k4
Marcks
Mark4
Matn1
Matr3
Mbip
Me1
Me2
Mea1
Med17
Med28
Med8
Med9
Mef2b
Melk
Mettl1
Mettl14
Mettl18
Mettl5
Mettl6
Mettl7a3
Mfap1a
Mfap1b
Mfhas1
Mfsd5
Mgat2
Mgat4d
Mgst3
Micall2
Midn
Mier1
Mipep
Mis18bp1
Mlxipl
Mmgt2
Mob3a
Mospd2
Mospd3
Mre11a
Mrgbp
Mro
Mroh2b
Mrpl14
Mrpl22
Mrpl46
Mrpl48
Mrpl51
Mrpl53
Mrpl54
Mrpl57
Mrpl58
Mrps18a
Mrps28
Mrps31
Mrps33
Mrps5
Mrtfb
Msantd1
Mtap
Mtch1
Mterf4
Mtif3
Mtrf1
Mtus1
Myh15
Naa10
Nans
Nap1l3
Napg
Nav2
Ncald
Ncaph
Ncbp3
Ncl
Ndel1
Ndrg4
Ndufaf6
Ndufaf7
Ndufb8
Ndufs5
Ndufv3
Nebl
Nek3
Nelfe
Net1
Nicn1
Ninj2
Nip7
Nkap
Nmt1
Noc2l
Noc3l
Nol9
Nop14
Nostrin
Npffr2
Nphp1
Nprl3
Nr1d1
Nrd1
Nrg3
Nrsn1
Nsmce1
Nsmce3
Nsun4
Nub1
Nudt2
Nudt9
Nusap1
Nvl
Oas1c
Oas1h
Oca2
Ociad1
Odr4
Ogfod2
Olfr283
Olfr976
Ophn1
Optn
Orai1
Orc2
Orc3
Os9
Osbpl9
Otub1
Otub2
Otud3
P4ha1
Padi6
Pafah1b1
Pag1
Paics
Pam
Panx1
Papolg
Parp2
Parp9
Pax2
Pbx2
Pcbd2
Pcdh10
Pcdh15
Pcgf3
Pcif1
Pclo
Pcnp
Pcolce2
Pcyt1a
Pdap1
Pdcd10
Pdcd11
Pdcd5
Pdia3
Pdia4
Pdlim3
Pdss2
Pdzd8
Pecr
Pex11a
Pglyrp1
Phactr3
Phf12
Phf7
Pi4k2a
Pi4ka
Pigk
Pik3cd
Pik3ip1
Pik3r1
Pin1rt1
Pip5k1b
Pitrm1
Plcb1
Plekha6
Pnpo
Polr2b
Polr2i
Polr3a
Polr3g
Pomk
Pop1
Pou4f1
Ppa1
Ppard
Ppef1
Ppp1r13b
Ppp1r14b
Ppp1r7
Ppp1r9b
Ppp6r1
Prelid1
Prkcsh
Prkd2
Prkg2
Proca1
Prorp
Prpf3
Prpf4b
Prr13
Prr14
Prr18
Psma7
Psmb3
Psmb4
Psmc1
Psmc2
Psmc3
Psmc5
Psmd10
Psmd12
Psmd7
Psmd8
Ptma
Ptpn3
Ptprh
Pum3
Pus3
Pxt1
Pygl
Qrfprl
Qtrt2
Rab13
Rab3b
Rad18
Rad54b
Ralbp1
Rars
Rasa4
Rbbp5
Rbm17
Rbm41
Rbm48
Rbpj
Rbpms2
Rcc2
Rccd1
Rdx
Reep6
Reps2
Rexo4
Rfc1
Rgn
Ribc1
Ric3
Rmdn1
Rnase6
Rnf122
Rnf144b
Rnf181
Rnf213
Rnf214
Rnf216
Rnf227
Romo1
Rp9
Rpgr
Rpgrip1l
Rpl10l
Rpl29
Rpl4
Rpl41
Rpn1
Rpp21
Rpp25l
Rps19bp1
Rps24
Rrbp1
Rrp1b
Rrp8
Rsl1d1
Rsrc1
Rsrc2
Rsu1
Rtl4
Rtn1
Rufy1
Rxra
Samd1
Sars
Sart1
Sass6
Sbno2
Scamp2
Scand1
Scfd1
Scin
Scn8a
Scyl1
Sdad1
Sdf2
Sdhb
Sdhc
Sec24b
Sec61b
Selenoh
Selenow
Selp
Sema3e
2007-09-01
Serpine2
Setd1a
Setd2
Sf3b4
Sgk1
Sh3bgrl3
Sh3pxd2a
Sharpin
Shisa8
Shld2
Shld3
Shroom2
Shtn1
Sil1
Ska3
Slamf1
Slc10a4l
Slc12a8
Slc17a6
Slc35b1
Slc39a8
Slc4a1ap
Slc9a2
Smc1a
Smg7
Smim1
Smim19
Snrpf
Snupn
Snx17
Snx30
Snx32
Sos2
Spata21
Spata5
Spc25
Spsb3
Sptlc3
Sra1
Srfbp1
Srpk2
Srpr
Ssbp3
Ssna1
St13
Stambp
Stat4
Stat6
Stau2
Stim2
Stk11
Stk31
Stk35
Stk39
Stx17
Styk1
Suco
Supt16
Supt20
Supt7l
Surf1
Surf6
Svil
Sycp1
Sympk
Syvn1
Tacc1
Taco1
Taf1a
Taf6l
Tars2
Tatdn1
Tbc1d10b
Tbc1d20
Tbpl2
Tceanc2
Tcf25
Tchp
Tdrd3
Tdrd5
Tent5c
Tent5d
Terf1
Tet1
Tex10
Tex16
Tex9
Tfam
Tfdp2
Thap1
Thegl
Thrap3
Timd4
Timm44
Timm50
Tlk1
Tm2d2
Tm9sf4
Tma16
Tmem104
Tmem132c
Tmem151a
Tmem181a
Tmem183a
Tmem19
Tmem243
Tmem259
Tmem97
Tmsb10
Tmtc1
Tnfaip6
Tnik
Tnrc6c
Tor1aip1
Tox2
Tox3
Trappc1
Trappc3l
Trim30a
Trmt10a
Trmt10b
Trmt10c
Trmt112
Trmt6
Trrap
Tsc1
Tsc22d4
Tsn
Tspan31
Tspan33
Ttc1
Ttc16
Ttc39d
Ttc4
Ttc9c
Tubgcp2
Txlng
Txn1
Txndc9
Txnl4b
U2af1l4
U2surp
Ubac1
Ubap2l
Ube2i
Ube2q1
Ube2q2
Ube2u
Ubl3
Ubl7
Ubtf
Ubxn1
Uchl5
Ufc1
Uimc1
Umodl1
Upf3a
Uqcrc2
Usp26
Usp3
Usp50
Usp8
Utp18
Uvrag
Uxs1
Vamp9
Vcpkmt
Vgll4
Vps13c
Vps13d
Vps16
Vps25
Vps4a
Vrk1
Vwc2l
Wasf2
Wbp11
Wdr43
Wdr44
Wdr53
Wdr75
Wdr76
Wfdc15a
Wfdc3
Whamm
Wls
Wnk2
Wwc1
Wwc2
Wwp1
Xlr5a
Xpa
Ydjc
Yeats2
Ypel3
Zbtb2
Zbtb6
Zc3h15
Zcwpw1
Zfand6
Zfp142
Zfp182
Zfp217
Zfp248
Zfp35
Zfp414
Zfp433
Zfp438
Zfp472
Zfp57
Zfp58
Zfp605
Zfp61
Zfp646
Zfp7
Zfp709
Zfp746
Zfp791
Zfp830
Zfp940
Zfp958
Zfp963
Zfp979
Zfr
Zmym1
Znhit3
Zscan18
Zscan26
Zscan4c
Zw10
Zwilch
Zxdc
Zyg11b
Zzz3

## Sheet: De novo gain(1243 genes)
1110004F10Rik
1300017J02Rik
1810030O07Rik
2210408I21Rik
4930447C04Rik
4930522H14Rik
4930579F01Rik
4932415D10Rik
4932438A13Rik
5430401F13Rik
9130409I23Rik
9930021J03Rik
AA792892
Aamdc
Aass
Abcb5
Abcc9
Abhd6
AC125149.4
AC125149.5
AC132444.1
AC132444.5
AC133103.4
AC133103.5
AC164084.1
Acbd7
Acer3
Acyp2
Adam2
Adamtsl3
Adgrl3
AF067061
AF067063
Agbl1
Ahcyl1
Aida
Ajap1
Akap6
Akt1
Akt3
Aldh7a1
Alox12
Alyref
Amy1
Ank1
Ankfn1
Ankrd13c
Ankrd22
Ankrd28
Ankrd31
Anks1b
Ap1ar
Ap1s2
Ap3b1
Apc
Apool
Arap2
Arfgef1
Arfip1
Arhgap6
Arhgef26
Arid2
Arl6ip6
Arl8b
Arr3
Arsk
Ascc3
Asic2
Ate1
Atf7
Atg16l2
Atm
Atp6ap2
Atp6v0c
Atp6v1c2
Atxn2
Atxn3
Atxn7
Atxn7l1
AY761185
B020004J07Rik
B020031M17Rik
Baat
Bbs7
BC005537
BC028528
BC035044
BC147527
Bex1
Bex6
Bicd1
Bmi1
Bmp2k
Bmpr1a
Bola1
Bptf
Braf
Brca2
Brd8dc
Brwd1
Bspry
Btbd9
Btf3l4
C130026I21Rik
C130073F10Rik
C1d
C1galt1
C87499
Caap1
Cacybp
Cadm2
Cadps
Cadps2
Calhm6
Calml4
Camk2d
Camk4
Camkmt
Camta1
Capsl
Capza2
Card11
Cask
Catsperb
Cbwd1
Cbx3
Ccbe1
Ccdc162
Ccdc88a
Ccnb1ip1
Ccnc
Ccng2
Ccnj
Ccpg1os
Ccser1
Cct6b
Ccz1
Cd164
Cd200r1
Cd24a
Cd59b
Cdc26
Cdc37l1
Cdc42bpa
Cdh12
Cdh2
Cdh23
Cdk5rap1
Cdkal1
Cdkn3
Ceacam1
Cebpa
Cecr2
Celf2
Cep126
Cep170
Cep192
Cep290
Cers6
Cfap299
Cfap300
Chchd2
Chchd3
Chic1
Chl1
Chmp2b
Chp1
Chpt1
Chrm3
Chuk
Churc1
Ckap5
Clasp2
Cldn34c1
Cldn34c2
Clec18a
Clhc1
Clnk
Cmas
Cnga3
Cnksr3
Cntln
Cntn4
Cntnap5a
Cntnap5b
Cntnap5c
Coa6
Col20a1
Col24a1
Col4a5
Colgalt2
Copg2
Coq2
Cpd
Cpeb4
Crb1
Crebzf
Crk
Crls1
Crp
Cspp1
Cst7
Csta2
Cstb
Ctnnd2
Ctsl
Cutc
Cux1
Cyp2c23
Cyp2c67
D030056L22Rik
D13Ertd608e
D5Ertd579e
Dcaf17
Dcbld1
Dck
Ddah1
Ddhd1
Ddit4l
Ddx43
Defb13
Defb30
Defb42
Degs1
Dennd1b
Dhfr
Dhx9
Diablo
Diaph2
Dixdc1
Dlgap2
Dmxl2
Dnaja4
Dnajb14
Dpep1
Dph3
Dph6
Dph7
Dscam
Dst
Dusp5
Dzip3
E2f1
E2f4
E330009J07Rik
Eaf2
Ecpas
Eef1akmt1
Efcab8
Efhc2
Efnb2
Eid2
Eif2s3y
Eif4e
Elavl2
Elovl7
Emc6
Epb41l4b
Epha4
Epha5
Epm2a
Erbb4
Ercc4
Esco1
Esp24
Etl4
Etnk1
Exoc8
Exosc6
F8
Fabp9
Faiml
Fam117b
Fam120a
Fam149b
Fam184a
Fam45a
Fam49b
Fam76b
Fam8a1
Fbxl13
Fbxo15
Fbxo16
Fbxo47
Fbxw21
Fbxw28
Fcf1
Fcgr3
Fchsd2
Fcrl5
Fem1b
Fgf1
Fgf9
Flvcr1
Fmn2
Fmo4
Fmr1
Fnip1
Fnip2
Frat2
Fthl17b
Fthl17c
Fthl17d
Fthl17f
Fundc1
Fut8
Fv1
Fyb
Fzd3
Gab2
Gabrb3
Gabrg2
Galnt1
Galnt18
Galntl5
Garem1
Gca
Ggnbp2
Ggps1
Glcci1
Gldc
Gli3
Glod5
Gm10378
Gm10662
Gm10668
Gm10717
Gm10719
Gm10720
Gm10721
Gm10722
Gm10801
Gm11077
Gm11168
Gm11236
Gm11238
Gm11239
Gm11487
Gm11639
Gm11756
Gm12184
Gm12394
Gm12789
Gm12790
Gm13057
Gm13102
Gm13212
Gm15155
Gm1527
Gm16381
Gm17026
Gm17535
Gm2001
Gm2016
Gm2022
Gm2042
Gm20517
Gm2056
Gm20765
Gm20767
Gm21304
Gm21312
Gm21319
Gm21454
Gm21731
Gm21738
Gm21761
Gm21762
Gm21915
Gm21936
Gm2381
Gm281
Gm2956
Gm29644
Gm3183
Gm3383
Gm35060
Gm4027
Gm428
Gm43191
Gm45021
Gm45062
Gm45194
Gm4567
Gm5148
Gm5157
Gm5773
Gm5788
Gm5890
Gm5891
Gm6176
Gm6763
Gm6882
Gm6902
Gm7102
Gm7982
Gm7995
Gm8094
Gm8104
Gm8108
Gm8300
Gm8764
Gm9
Gmcl1
Gna12
Gna13
Gnai1
Gnb5
Gnpnat1
Golga5
Golph3
Gon7
Gpc5
Gphn
Gpm6a
Gpr50
Gpr63
Grap2
Greb1l
Grik1
Grik4
Grm5
Grxcr1
Gsdmc2
Gsdmc3
Gsto1
Gtdc1
Gtf2e2
Gtf3c4
H2ac11
H3f3b
Haus2
Hdac9
Hdgf
Heca
Hectd2
Hesx1
Higd1a
Hint1
Hmcn1
Hmgn1
Hmgn2
Hmgn5
Hmox2
Hnmt
Hnrnpa3
Hormad1
Hpse2
Hras
Hs3st3a1
Hs6st2
Hsd17b13
Hspb1
Ier5
Ifng
Ift57
Il1rapl1
Il1rapl2
Il20ra
Inpp4b
Ints8
Ipmk
Iqcf2
Iqcf5
Iqcg
Iqub
Ireb2
Isca2
Itgb6
Itih5
Itpa
Jcad
Josd1
Kansl1l
Kat6a
Kat6b
Katnbl1
Kcnab1
Kcnb2
Kcnip1
Kcnip4
Kcnmb4
Kctd12
Kctd8
Khdrbs1
Kif15
Kif20b
Kif26b
Klf4
Klhl15
Klhl2
Klhl4
Klhl6
Klhl8
Klhl9
Klrb1
L1td1
L3mbtl3
L3mbtl4
Lamp2
Lancl3
Large1
Larp1
Lars2
Lca5
Lemd3
Lepr
Lhfpl3
Limch1
Lin7c
Lonp2
Lonrf1
Lrba
Lrmp
Lrrc2
Lrrc47
Lrrc74b
Lrrc9
Lsm14a
Lsm8
Lst1
Lyrm2
Macf1
Mageb18
Magt1
Mak16
Malrd1
Mamdc2
Man2a1
Map3k3
Map3k7
Map7d3
Mapk8
Mapkapk2
2002-03-01
2003-03-01
Mbd3l2
Mblac2
Mbtd1
Mcee
Mcl1
Mcts1
Mcts2
Mecom
Mef2a
Megf9
Memo1
Mettl15
Mettl9
Mfap5
Mfn1
Mfsd6
Micu1
Mier3
Mindy3
Mkrn1
Mmp16
Mms22l
Mogat1
Mosmo
Mphosph6
Mplkip
Mrgprx2
Mroh8
Mrpl39
Mrpl52
Msantd2
Msmo1
Msrb1
Mtch2
Mtf2
Mtpap
Myo16
Myo7b
Naa16
Naa30
Naalad2
Naaladl2
Nadk2
Naf1
Nanos1
Nanp
Nav3
Nbeal1
Nckap1
Ndufa9
Ndufaf5
Ndufb3
Neb
Necab1
Negr1
Neil3
Nek1
Nek5
Nelfa
Neto2
Nfat5
Nipal1
Nkain2
Nkain3
Nlrp4b
Nlrp9c
Nmd3
Nme2
Nod1
Nop10
Npsr1
Nptn
Nr6a1
Nrcam
Nrxn1
Ntng1
Nudt5
Nuf2
Nup153
Nup35
Nup62cl
Nus1
Obox8
Ocm
Oip5
Ola1
Olfm3
Olfr118
Olfr329
Olfr376
Olfr60
Olfr667
Olfr787
Olfr815
Olfr881
Orc4
Orc5
Ost4
Oxr1
P2ry1
Pank2
Pank3
Papolb
Parp12
Pcdh7
Pcf11
Pcgf5
Pcm1
Pdcd7
Pde3b
Pdgfrl
Pds5a
Pdxp
Pemt
Pex3
Pgm5
Pgrmc1
Pgrmc2
Phc2
Phf11a
Phykpl
Pign
Pik3cb
Pip4k2a
Pitpna
Pkd2l1
Pkp4
Pla2g12a
Pla2g4a
Pla2g4c
Plaat3
Platr25
Pld5
Plp2
Plppr5
Pnlip
Pola1
Polr2k
Polr3k
Pop5
Poteg
Potegl
Pou3f1
Pou6f2
Ppp1cb
Ppp1r2
Ppp1r9a
Ppp2cb
Ppp2r2b
Ppp4r3a
Pramel4
Pramel6
Prdm4
Prdx4
Prelid2
Prex2
Prickle1
Prkag2
Prkar2a
Prkar2b
Prkcq
Prmt6
Prpf40a
Prpsap2
Prr11
Psd3
Ptpdc1
Ptpmt1
Ptpn9
Ptprt
Purg
Pwwp2a
Rab30
Rab3c
Rab4a
Rad51b
Ralgapa1
Ranbp2
Ranbp9
Rap1b
Raph1
Rasef
Rassf8
Rb1cc1
Rbms3
Rbmx2
Rdh10
Reln
Rfk
Rfpl4b
Rfx3
Rfx7
Rgs18
Rhbdd1
Rhoa
Rimklb
Riok3
Rnf11
Rnf149
Rnf7
Rpl10
Rpl36a-ps1
Rpl37a
Rpl39
Rpl9-ps6
Rpp14
Rpp40
Rps13
Rps17
Rps27rt
Rragc
Rtn4
Rufy3
Rundc3b
Runx2
Rwdd4a
Rxylt1
S100a13
S100pbp
Samd12
Samt2
Sat1
Sbf2
Scai
Scamp1
Sccpdh
Selenot
Serinc4
Setx
Sgk3
Sgpp1
Sh3glb1
Sh3tc1
Shcbp1
Shld1
Shoc1
Ska2
Skap2
Skint6
Slc12a6
Slc14a2
Slc16a4
Slc22a28
Slc25a14
Slc25a17
Slc25a21
Slc30a1
Slc35a3
Slc38a6
Slc39a11
Slc6a11
Slc7a5
Slc9a9
Slmap
Smad7
Smarcad1
Smc5
Smco4
Smim13
Smim15
Sms
Snrpc
Snrpn
Snx14
Snx27
Snx5
Socs5
Sos1
Sox12
Spast
Spic
Spink2
Spon2
Spopfm2
Spopfm3
Sppl3
Spred1
Spry2
Spryd7
Sptssb
Spz1
Srp9
Srsf9
Ssr3
Stard7
Stradb
Strn3
Stt3b
Styx
Sugct
Susd1
Sva
Syap1
Synj2bp
Synpr
Sypl
Syt14
Syt16
Tada2b
Taf13
Taf4b
Tapt1
Tasor
Tasor2
Tasp1
Tatdn3
Tbc1d23
Tcf12
Tcl1b5
Tdpoz1
Tdpoz2
Tdpoz8
Tecta
Tefm
Tenm4
Terb2
Tex15
Tgs1
Thoc2
Thoc2l
Thyn1
Timm10
Tiprl
Tle4
Tmed6
Tmed7
Tmem126a
Tmem161b
Tmem167
Tmem33
Tmem45b
Tmem56
Tmem68
Tmem69
Tmem74
Tmem92
Tmigd1
Tmlhe
Tmsb15b1
Tmsb15l
Tmsb4x
Tmx3
Tnks
Tomm20
Tomm5
Tomm7
Tomm70a
Tpd52
Tpo
Tprgl
Tprkb
Trap1a
Trappc2l
Trdn
Trim43c
Trim59
Trir
Trmt11
Trpm3
Trpm7
Trps1
Tsacc
Tslp
Tspan5
Tsx
Ttc28
Ttc6
Ttll7
Ttn
Tut4
Txndc12
Txnl4a
Ube2d2a
Ube2v2
Ube2z
Ube3a
Ube3c
Ugt8a
Unc13b
Usp12
Usp24
Usp25
Usp9x
Usp9y
Utp14b
Uxt
Vat1l
Vmn1r210
Vmn1r227
Vmn1r32
Vmn1r59
Vmn1r76
Vmn1r88
Vmn2r117
Vmn2r37
Vmn2r52
Vmn2r63
Vmn2r80
Vmn2r94
Vps54
Vwa8
Wac
Washc3
Wasl
Wdfy3
Wdr5b
Wdr64
Wdr82
Wdyhv1
Wfdc18
Wnt2b
Xlr4c
Xpo6
Xrn1
Yes1
Yrdc
Ywhae
Ywhaq
Yy1
Zbtb12
Zc3h12b
Zc3h14
Zc3h6
Zc3h7a
Zcchc24
Zdhhc5
Zfand3
Zfp280d
Zfp326
Zfp36l2
Zfp385b
Zfp503
Zfp518a
Zfp560
Zfp654
Zfp706
Zfp809
Zfp960
Zfp977
Zfp985
Zfp986
Zfp988
Zfp989
Zfp995
Zfx
Zfyve16
Zmym4
Znrd1
Zup1
2700097O09Rik
AC133103.1
Acot13
Actg1
Adamts19
Adcy8
Adh5
Adi1
Akap9
Alms1
Ankrd17
Asb3
Atp5mpl
Atp6v1h
Atrx
B2m
B4galt6
BB287469
Bbs5
Bet1
Bmt2
Bud31
C87977
Calm2
Ccdc18
Ccdc59
Cd55
Cdk1
Cept1
Cfap58
Chic2
Clk1
Cndp1
Coq10b
Cox7b
Csmd1
Ctdsp1
Dcaf10
Dcaf13
Dnah14
Dnajb9
Dynlrb1
Eef1akmt4
Eef1e1
Eif2s1
Esyt2
Fbxw14
Fbxw15
Gabarap
Gid4
Gls
Glt8d1
Gm10436
Gm10800
Gm13023
Gm13084
Gm13103
Gm21818
Gm43552
Gm7942
Gpc3
H1f5
Hat1
Ica1l
Katna1
Kctd6
Kpna4
Lbp
Luc7l2
Ly96
Lyst
Lztfl1
Mapk14
Me3
Mei4
Mex3c
Mknk2
Mlf1
Mreg
mt-Atp6
Mterf3
Mzt1
Naa20
Nae1
Nat8f2
Ndufv2
Noct
Nsmce4a
Nudt4
Nup43
Obox5
Olfr699
Oog1
Oog2
Oog4
Pdzph1
Prdx3
Psmb7
Rab11a
Ramac
Rbbp6
Resf1
Rhebl1
Rorb
Ros1
Sap18b
Scd3
Selenof
Senp8
Siah2
Slain2
Slc15a5
Snapc3
Snx16
Snx3
Srf
Srsf1
Srsf3
Stmn1
Syndig1
Taf15
Tcl1b2
Tcl1b3
Tcl1b4
Tcstv3
Timm8a1
Trim44
Tsc22d2
Ttc19
Tusc3
Txnl1
Ube2a
Ube2n
Ufm1
Usp27x
Usp31
Vdac3
Wdr17
Yipf4
Yipf5
Zfp281
Acadsb
AK157302
Ammecr1
Amn1
Arl15
Arpc5l
Atp1b3
Atp5e
Atp8a2
B230118H07Rik
BC031181
Bend5
Bnip1
Ccdc38
Ccdc6
Ccdc62
Cd209c
Cdo1
Clns1a
Cmtm2a
Cnpy2
Cox16
Cox6b1
Cpxm2
Dad1
Dctn3
Defb8
Dgcr6
Dkc1
Eif3e
Eif4a2
Fam162a
Fam221b
Fam81b
Fam90a1a
Fancl
Fdx1
Foxk2
Gm10324
Gm14444
Gnat3
Gng3
H1f1
Hus1
Igfbp7
Il1r1
Itgad
Jagn1
Lamtor3
Larp1b
Lbhd1
Ldb1
Lpcat2
Lyplal1
Mib1
Mrps23
Mrrf
Nbdy
Ndufa1
Nit2
Nol12
Nrg4
Oaz1
Pate14
Pdpn
Pfn2
Phf11c
Pigl
Pigx
Pik3c2g
Pikfyve
Pmpcb
Pnpla2
Ppa2
Psmg1
Rasl2-9
Rbbp4
Ripply3
Rpf1
Rprd2
Rubcnl
Samd4b
Sc5d
Scpep1
Sec22b
Senp2
Serpinb1c
Sgip1
Slc25a31
Slc44a3
Smdt1
Smim9
Snrpa1
Spa17
Spag7
Speer4f2
Sptbn1
Srp72
Ssu72
Stk40
Sult2a4
Tbca
Tfap2a
Timm21
Timm23
Tmc4
Tmem254b
Tmem70
Tprg
Uck2
Uqcrh
Veph1
Wdcp
Xlr5b
Yeats4
Zfp600
Zrsr2

## Sheet: Inherited(609 genes)
0610009B22Rik
1110012L19Rik
1110059G10Rik
1700093K21Rik
1810013L24Rik
1810058I24Rik
3110001I22Rik
4921524J17Rik
4930453N24Rik
Abhd15
Abhd17b
Abhd17c
Abl2
AC168977.1
Acsl3
Actr10
Adipor2
Adtrp
Agbl3
Agr3
Ahctf1
Akirin2
Aldh1a2
Anapc10
Ankrd13a
Ap3s1
Arf6
Arg2
Arhgef12
Arih1
Arl5b
Atad2b
Atg10
Atp2a2
Atp5c1
Atp5g3
Atp6v1d
Atpif1
Bbip1
Bhlhe41
Birc6
Bnip3l
Bod1
Brdt
Bri3
Brix1
Btf3
Btg4
C1qbp
Cab39
Cables2
Calm1
Calr4
Camk1d
Camsap2
Cbx1
Cc2d2b
Ccdc122
Ccdc173
Ccdc186
Ccdc58
Ccdc73
Ccdc74a
Ccdc90b
Ccnh
Ccni
Ccnk
Ccnyl1
Cdc34
Cdr2
Cds1
Ceacam20
Cebpg
Cenpe
Cenpf
Cenph
Cenpk
Cenpp
Cenpq
Cep350
Cetn2
Cetn3
Cfap36
Cfap46
Cfl2
Chmp5
Chst7
Cks1b
Clspn
Cmc4
Cnih1
Cnot6l
Commd3
Commd6
Cop1
Copz1
Cox5a
Cript
Csnk1g2
Csnk2a2
Csnk2b
Csrnp3
Ctcf
Cth
Cul3
Cwc15
Cyp4a14
Daw1
Dazl
Dbf4
Dbi
Dcbld2
Dcun1d5
Denr
Desi2
Dhx36
Diaph1
Dmwd
Dmxl1
Dnajc21
Dnajc5b
Dnm3
Dppa3
Dpy30
Dstn
Dusp7
Dut
Dym
Dynll1
E2f5
E330034G19Rik
Eapp
Eif1
Eif1ax
Eif1b
Eif3b
Eif3h
Ell2
Elobl
Eloc
Emc7
Eny2
Ep300
Epc2
Ergic2
Erh
Etaa1
Evi5
Exosc1
Exosc8
Ezh2
Fam133b
Fam193a
Fam92a
Fam98b
Fbxo11
Fbxo33
Fbxo36
Fbxw26
Fer
Foxo1
Frg1
Ftdc
Fth1
Fyn
Gabarapl2
Gatad2b
Gclm
Ggct
Gins1
Gipc2
Gkap1
Glrx
Gm10131
Gm10563
Gm11237
Gm20075
Gm49337
Gm50139
Gm5065
Gm527
Gm7879
Gmnn
Gnai2
Gnl3
Gnpda2
Gpbp1l1
Grsf1
Gsk3b
Gsta4
Gstm5
Gtf2a2
Gtf2b
Gtf2f2
Gtf2h5
Gtpbp4
Gyg
H2az1
H3f3a
Hdac2
Herpud2
Hhex
Hmga2
Hmgn3
Hnrnpa0
Hnrnpa2b1
Hnrnpab
Hnrnpd
Hnrnpu
Hnrnpul2
Homer1
Hpf1
Hprt
Hsbp1
Hscb
Hsp90aa1
Hypk
Id2
Ifitm6
Ift43
Imp3
Ints6
Iqca
Iqgap2
Itga6
Kctd3
Kdm1a
Khdc1c
Khsrp
Kif2a
Kin
Kmt2c
Knl1
Kras
Lactb2
Larp4
Lbx1
Ldlrad4
Lef1
Lgsn
Lrif1
Lrrc28
Lsamp
Lsm1
Lsm12
Lsm2
Lsm3
Lyrm1
Lyrm4
Maco1
Mael
Magoh
Magohb
2005-03-01
Mbd2
Mbl2
Mcmbp
Med10
Med13
Med21
Med30
Med31
Med6
Mepce
Mff
Mfsd13b
Mgat4a
Mgat4c
Micos10
Mis18a
Mki67
Mob4
Mocs2
Mon2
Mphosph10
Mphosph8
Mrpl13
Mrpl32
Mrpl35
Mrpl40
Mrps14
Mrps22
Mrps25
Msl2
mt-Co1
mt-Co3
mt-Cytb
mt-Nd1
mt-Nd2
mt-Nd3
mt-Nd4
mt-Nd4l
mt-Nd5
mt-Nd6
Mthfs
Mthfsl
Mybl1
Mycbp
Mycbp2
Myocos
N4bp2l2
Nab1
Nasp
Nbn
Ncoa6
Ndufa4
Ndufaf4
Ndufb9
Ndufs4
Nectin3
Nedd8
Nexn
Nf1
Nfxl1
Nfyb
Nkrf
Nme7
Nol7
Npas3
Npm2
Nrep
Nsmce2
Ntan1
Nucks1
Nufip2
Nup37
Nutf2-ps1
Obox1
Obox2
Obox3
Omt2a
Ooep
Oosp1
Oosp3
Orc6
Ormdl2
Ostc
Otud1
Otud4
Otud5
Pabpn1
Paf1
Pak2
Pan3
Paqr3
Pfdn1
Pfdn4
Pfn4
Phax
Phf14
Phf3
Phyhipl
Picalm
Pigf
Pik3ca
Pkd2l2
Pkn2
Plekha3
Plekha8
Plxnc1
Pnrc1
Polb
Pole4
Polr1d
Ppfia1
Ppia
Ppib
Ppig
Ppil4
Ppm1a
Ppm1h
Ppp2ca
Ppp3cb
Ppp4r2
Pptc7
Ppwd1
Prdx1
Prim1
Prkd1
Prl8a2
Prpf38a
Prpf8
Prrc2c
Psip1
Psma1
Psma2
Psma6
Psmb2
Psmc6
Psmd14
Psmd6
Psme3
Psme4
Pten
Ptges3
Ptpn2
Ptrh2
Qk
Qser1
Rab12
Rab21
Rab22a
Rab2a
Rab5if
Rab9
Ran
Ranbp1
Rap2a
Rasa1
Rbm25
Rbm26
Rbm3
Rbm33
Rc3h1
Rcor1
Reps1
Rev3l
Rexo2
Rfpl4
Rgs10
Rgs17
Rgs2
Rheb
Rif1
Rmnd5a
Rnf138
Rnf19b
Rnpc3
Rock1
Rock2
Rpa3
Rpf2
Rpl10-ps3
Rpl17
Rpl36al
Rpl39l
Rtraf
Sar1b
Scaper
Scg3
Sclt1
Sec11a
Sec22a
Sem1
Senp6
Senp7
2011-09-01
Sf3b6
Sfpq
Sfr1
Siah1a
Sirt1
Ska1
Skp1a
Slain1
Slc12a2
Slc9b1
Smap2
Smc1b
Smc2
Smc6
Smim20
Smim26
Smndc1
Smurf2
Snhg4
Snrnp27
Snrnp48
Snrpb2
Snrpd1
Snu13
Snx6
Sp1
Sp110
Spcs1
Sptssa
Srek1ip1
Srp14
Srp19
Srpk1
Srrm1
Srsf2
Srsf7
Ss18l2
Ssb
Stard3nl
Stxbp5
Sub1
Sumo1
Sumo2
Supt3
Supt4a
Suv39h2
Suz12
Swt1
Sycp3
Tab2
Tab3
Taf1d
Taf5
Taf7
Taf9
Taok1
Tbc1d13
Tceal8
Tcl1b1
Tcstv1
Tdrd12
Tent4a
Tent4b
Tex11
Tex12
Tex26
Tex30
Tfap2e
Tfb1m
Tgfb2
Thap12
Them4
Thoc7
Tigd2
Timm17a
Timm9
Tipin
Tmcc1
Tmco1
Tmed10
Tmem132d
Tmem216
Tmem232
Tmem29
Tmem35b
Tmem60
Tmem65
Tmf1
Tnfsf13b
Tnks2
Top1
Top2b
Tpgs2
Trappc2
Trappc8
Triap1
Trim13
Trim24
Trim33
Trim41
Triqk
Tyw5
Ube2b
Ube2c
Ube2e3
Ube2h
Ube2t
Ube2w
Ubfd1
Ubl5
Ubn2
Ubp1
Ubr3
Ubr5
Uchl3
Ugcg
Uhmk1
Upf1
Upf3b
Usp1
Usp16
Usp29
Usp34
Usp53
Utp11
Vamp7
Vapa
Vbp1
Vma21
Vmn1r139
Vps29
Wapl
Wbp4
Wdr26
Wdr61
Wnk1
Wscd2
Wtap
Xlr3a
Xlr4a
Xlr4b
Yae1d1
Yaf2
Ybx1
Ybx2
Ybx3
Ypel5
Ythdc1
Ywhaz
Zbtb18
Zc3h8
Zcchc10
Zcchc7
Zcrb1
Zfc3h1
Zfp277
Zfp318
Zfp770
Zfp839
Zfp91
Zmat2
Znrd1as

## Sheet: Major ZGA(428 genes)
1300017J02Rik
1810030O07Rik
2510039O18Rik
4932415D10Rik
AC125149.4
AC125149.5
AC132444.1
AC132444.5
AC133103.1
AC133103.4
AC133103.5
AC168977.1
Adi1
AF067061
AF067063
Ajap1
Ak6
Alyref
Ankrd22
Arf6
Arhgef26
Atad2b
Ate1
Atm
Atraid
AY761185
B020004J07Rik
B020031M17Rik
B2m
Baat
BB287469
BC028528
BC147527
Bex1
Bex6
Bicd1
Birc6
Bola1
Brd8dc
Btg1
C1d
Caap1
Cab39
Cables2
Cacybp
Calhm6
Calml4
Capsl
Cbwd1
Cbx3
Ccnb1ip1
Cct6b
Cd200r1
Cdh12
Cdk1
Cdk13
Cdkn3
Ceacam1
Cebpa
Chchd2
Chd1
Chpt1
Chuk
Churc1
Clec18a
Clhc1
Cmss1
Coa6
Colgalt2
Cpd
Crebzf
Cst7
Cstb
Ctsl
Cul3
Cyp2c23
D030056L22Rik
D13Ertd608e
Dcaf10
Dck
Ddit4l
Ddx43
Defb30
Defb42
Dhx9
Dnajb14
Dnajb9
Dpep1
Dusp5
Eef1akmt1
Eef1akmt4
Efcab8
Eid2
Eif2s3y
Eif3b
Eif3f
Eif3h
Ell2
Ep300
Epm2a
Ercc4
Esf1
Esp24
Etnk1
Exoc8
Exosc6
Fabp9
Faf1
Faiml
Fbxo15
Fbxo16
Fbxo33
Fbxo36
Fcf1
Fcgr3
Fcrl5
Fkbp3
Fmr1
Fmr1nb
Frat2
Fthl17b
Fthl17c
Fthl17d
Fthl17f
Fv1
Gabarap
Gabarapl2
Galntl5
Gldc
Glod5
Gls
Gm10563
Gm10662
Gm10668
Gm10717
Gm10719
Gm10720
Gm10721
Gm10722
Gm10800
Gm11077
Gm11168
Gm11236
Gm11237
Gm11756
Gm12184
Gm12394
Gm12789
Gm12790
Gm13102
Gm1527
Gm16381
Gm17535
Gm2001
Gm2016
Gm2022
Gm2056
Gm20767
Gm21304
Gm21319
Gm21454
Gm21731
Gm21738
Gm21761
Gm21762
Gm21818
Gm21915
Gm21936
Gm2381
Gm2956
Gm29644
Gm3183
Gm4027
Gm428
Gm4567
Gm5148
Gm5157
Gm5773
Gm5788
Gm5890
Gm5891
Gm6176
Gm6763
Gm6882
Gm6902
Gm7102
Gm8094
Gm8104
Gm8108
Gm8300
Gm9
Gon7
Gpc3
Gpr50
Grb2
Grm5
Gsto1
Gtf3c4
H2ac11
H2az1
Haus2
Hesx1
Hexb
Hmgn2
Hmox2
Hnrnpab
Hspb1
Ier5
Ifng
Il20ra
Imp3
Iqub
Isca2
Itih5
Itpa
Jmy
Jund
Kctd12
Kctd6
Khdrbs1
Kpna4
L1td1
Lamp2
Larp1
Larp4
Lemd3
Lrrc2
Lsm8
Lst1
Luc7l2
Lyrm2
Mak16
Map3k3
Mblac2
Mcl1
Mcts1
Mcts2
Med14
Mfap5
Mknk2
Mkrn1
Mogat1
Mpc2
Mplkip
Mrgprx2
Mroh8
Mrpl52
Mrps6
Msantd2
Msrb1
Myo7b
Naalad2
Naf1
Ndufa9
Ndufaf5
Nipal1
Nme2
Nod1
Nop10
Nsmce4a
Nudt4
Nup62cl
Obox3
Obox8
Ocm
Odc1
Oip5
Ola1
Olfr329
Olfr376
Olfr815
Ormdl2
Ost4
Pabpn1
Pak2
Pank3
Papolb
Pbdc1
Pcgf5
Pdgfrl
Pds5a
Pemt
Phf11a
Plaat3
Platr25
Plppr5
Pnlip
Polr2k
Potegl
Pou3f1
Ppia
Ppm1a
Ppp1r2
Ppp2cb
Ppp4r3a
Pramel4
Pramel6
Prdx4
Prelid2
Prkcq
Prmt6
Prorsd1
Prr11
Psmd14
Ptpmt1
Ptpn9
Ranbp2
Rasef
Rb1cc1
Rbbp6
Rbmx2
Rcor1
Rfpl4b
Rhbdd1
Rnf11
Rnf7
Rnpc3
Ros1
Rpl10
Rpl36a-ps1
Rpl36al
Rpl37a
Rpl39
Rpl9-ps6
Rpp40
Rps17
Rps27rt
Rwdd4a
Samt2
Sat1
Scd3
Sec63
Serinc4
Sf3b6
Sgk3
Sgpp1
Sh3tc1
Sirt1
Ska1
Ska2
Skint6
Slc12a2
Slc14a2
Slc25a28
Slc7a5
Smad7
Smim13
Snapc3
Snapc5
Snrpc
Snx14
Snx27
Snx5
Sos1
Sox12
Spic
Spink2
Spopfm2
Spopfm3
Spry2
Spz1
Srsf1
Srsf7
Srsf9
Ss18l2
Strn3
Sumo2
Supt4a
Sva
Syap1
Synpr
Taf1d
Taf4b
Tasp1
Tcstv3
Tdpoz1
Tdpoz2
Tdpoz8
Tefm
Tent4b
Terb2
Tgs1
Them4
Thoc2l
Timm10
Tmcc1
Tmed6
Tmem45b
Tmem56
Tmem68
Tmem69
Tomm20
Tomm22
Tomm5
Tomm7
Tomm70a
Tprkb
Trim33
Trim43c
Trir
Tsc22d2
Ube2c
Ubr5
Uhmk1
Usp12
Usp9y
Utp11
Utp14b
Vmn1r210
Vmn1r227
Vmn2r37
Vmn2r52
Wdyhv1
Wnk1
Yy1
Zbtb12
Zc3h12b
Zfc3h1
Zfp352
Zfp809
Zfp977
Zfp985
Zfp986
Zfp988
Zfp989
Zfx
Znrd1
Zranb1

## Sheet: Fig2.B
0610009B22Rik
1110012L19Rik
1110059G10Rik
1810013L24Rik
1810058I24Rik
3110001I22Rik
4921524J17Rik
Abhd17b
Abhd17c
Abl2
Acsl3
Actr10
Adipor2
Adtrp
Agr3
Ahctf1
Akirin2
Aldh1a2
Anapc10
Ankrd13a
Ap3s1
Arf6
Arg2
Arhgef12
Arih1
Atad2b
Atp2a2
Atp5c1
Atp5g3
Atp6v1d
Atpif1
Bbip1
Bhlhe41
Birc6
Bnip3l
Bod1
Brdt
Bri3
Brix1
Btf3
Btg4
C1qbp
Cab39
Cables2
Calm1
Calr4
Camk1d
Camsap2
Cbx1
Cc2d2b
Ccdc122
Ccdc173
Ccdc186
Ccdc58
Ccdc73
Ccdc74a
Ccdc90b
Ccnh
Ccni
Ccnk
Ccnyl1
Cdc34
Cdr2
Cds1
Ceacam20
Cebpg
Cenpe
Cenpf
Cenph
Cenpq
Cep350
Cetn2
Cetn3
Cfl2
Chmp5
Chst7
Cks1b
Clspn
Cmc4
Cnih1
Cnot6l
Commd3
Commd6
Cop1
Copz1
Cox5a
Cript
Csnk1g2
Csnk2a2
Csnk2b
Ctcf
Cth
Cul3
Cwc15
Daw1
Dazl
Dbf4
Dbi
Dcbld2
Dcun1d5
Denr
Desi2
Dhx36
Diaph1
Dmwd
Dmxl1
Dnajc21
Dppa3
Dpy30
Dstn
Dusp7
Dut
Dym
Dynll1
E2f5
E330034G19Rik
Eapp
Eif1
Eif1ax
Eif1b
Eif3b
Eif3h
Ell2
Elobl
Eloc
Emc7
Eny2
Ep300
Epc2
Ergic2
Erh
Etaa1
Evi5
Exosc8
Ezh2
Fam133b
Fam193a
Fam92a
Fam98b
Fbxo11
Fbxo33
Fbxw26
Fer
Foxo1
Frg1
Ftdc
Fth1
Fyn
Gabarapl2
Gatad2b
Gclm
Ggct
Gins1
Gipc2
Gkap1
Glrx
Gm10131
Gm11237
Gm49337
Gm50139
Gm5065
Gm527
Gmnn
Gnai2
Gnl3
Gnpda2
Gpbp1l1
Grsf1
Gsk3b
Gsta4
Gstm5
Gtf2a2
Gtf2b
Gtf2f2
Gtf2h5
Gtpbp4
Gyg
H2az1
H3f3a
Hdac2
Herpud2
Hhex
Hmga2
Hmgn3
Hnrnpa0
Hnrnpa2b1
Hnrnpab
Hnrnpd
Hnrnpu
Hnrnpul2
Homer1
Hpf1
Hprt
Hsbp1
Hsp90aa1
Hypk
Id2
Ifitm6
Ift43
Imp3
Ints6
Iqca
Iqgap2
Itga6
Kctd3
Kdm1a
Khdc1c
Khsrp
Kif2a
Kmt2c
Knl1
Kras
Lactb2
Larp4
Lbx1
Lef1
Lrif1
Lrrc28
Lsm1
Lsm12
Lsm2
Lyrm1
Lyrm4
Maco1
Mael
Magoh
Magohb
2005-03-01
Mbd2
Mbl2
Mcmbp
Med10
Med13
Med21
Med30
Med31
Med6
Mepce
Mff
Mfsd13b
Mgat4a
Micos10
Mis18a
Mki67
Mob4
Mon2
Mphosph10
Mphosph8
Mrpl13
Mrpl32
Mrpl35
Mrpl40
Mrps14
Mrps25
Msl2
mt-Co1
mt-Co3
mt-Cytb
mt-Nd1
mt-Nd2
mt-Nd3
mt-Nd4
mt-Nd4l
mt-Nd5
mt-Nd6
Mthfs
Mthfsl
Mybl1
Mycbp
Mycbp2
Myocos
N4bp2l2
Nab1
Nasp
Nbn
Ncoa6
Ndufa4
Ndufaf4
Ndufb9
Ndufs4
Nectin3
Nedd8
Nexn
Nf1
Nfxl1
Nfyb
Nkrf
Nme7
Nol7
Npas3
Npm2
Nsmce2
Ntan1
Nucks1
Nufip2
Nup37
Nutf2-ps1
Obox1
Obox2
Obox3
Omt2a
Ooep
Oosp1
Oosp3
Orc6
Ormdl2
Ostc
Otud1
Otud4
Otud5
Pabpn1
Paf1
Pan3
Pfdn1
Pfdn4
Pfn4
Phax
Phf14
Phf3
Phyhipl
Picalm
Pigf
Pik3ca
Pkd2l2
Pkn2
Plekha3
Plekha8
Plxnc1
Pnrc1
Polb
Pole4
Polr1d
Ppfia1
Ppia
Ppib
Ppig
Ppil4
Ppm1a
Ppm1h
Ppp2ca
Ppp3cb
Ppp4r2
Pptc7
Ppwd1
Prdx1
Prkd1
Prpf38a
Prpf8
Prrc2c
Psip1
Psma1
Psma2
Psma6
Psmb2
Psmc6
Psmd14
Psmd6
Psme3
Psme4
Pten
Ptges3
Ptpn2
Qk
Qser1
Rab12
Rab21
Rab22a
Rab2a
Rab5if
Rab9
Ran
Ranbp1
Rap2a
Rasa1
Rbm25
Rbm26
Rbm3
Rbm33
Rc3h1
Rcor1
Reps1
Rev3l
Rexo2
Rfpl4
Rgs10
Rgs17
Rgs2
Rheb
Rif1
Rmnd5a
Rnf138
Rnf19b
Rnpc3
Rock1
Rock2
Rpa3
Rpf2
Rpl10-ps3
Rpl17
Rpl36al
Rpl39l
Rtraf
Sar1b
Scaper
Sclt1
Sec11a
Sec22a
Sem1
Senp6
Senp7
2011-09-01
Sf3b6
Sfpq
Sfr1
Siah1a
Sirt1
Ska1
Skp1a
Slain1
Slc12a2
Slc9b1
Smap2
Smc2
Smc6
Smim20
Smndc1
Smurf2
Snrnp27
Snrnp48
Snrpb2
Snrpd1
Snu13
Snx6
Sp1
Sp110
Spcs1
Sptssa
Srek1ip1
Srp14
Srp19
Srpk1
Srrm1
Srsf2
Srsf7
Ss18l2
Ssb
Stard3nl
Stxbp5
Sub1
Sumo1
Sumo2
Supt4a
Suv39h2
Suz12
Swt1
Sycp3
Tab2
Tab3
Taf1d
Taf5
Taf7
Taf9
Taok1
Tbc1d13
Tcl1b1
Tcstv1
Tdrd12
Tent4a
Tent4b
Tex11
Tex12
Tfap2e
Tgfb2
Thap12
Thoc7
Timm17a
Timm9
Tipin
Tmcc1
Tmco1
Tmed10
Tmem132d
Tmem216
Tmem232
Tmem29
Tmem35b
Tmem60
Tmem65
Tmf1
Tnfsf13b
Tnks2
Top1
Top2b
Tpgs2
Trappc2
Trappc8
Triap1
Trim13
Trim24
Trim33
Trim41
Triqk
Ube2b
Ube2c
Ube2e3
Ube2h
Ube2t
Ube2w
Ubfd1
Ubl5
Ubn2
Ubp1
Ubr3
Ubr5
Uchl3
Ugcg
Uhmk1
Upf1
Upf3b
Usp1
Usp16
Usp29
Usp34
Usp53
Utp11
Vapa
Vbp1
Vma21
Vmn1r139
Vps29
Wapl
Wbp4
Wdr26
Wdr61
Wnk1
Wtap
Xlr3a
Xlr4b
Yae1d1
Yaf2
Ybx1
Ybx2
Ybx3
Ypel5
Ythdc1
Ywhaz
Zbtb18
Zc3h8
Zcchc10
Zcchc7
Zcrb1
Zfc3h1
Zfp277
Zfp318
Zfp770
Zfp839
Zfp91
Zmat2
Znrd1as

## Sheet: Fig2.G
333 protein_with_LiRibo_with inherited m6A+
Abhd17b
Abl2
Acsl3
Actr10
Agr3
Ahctf1
Akirin2
Anapc10
Ankrd13a
Ap3s1
Arf6
Arg2
Arih1
Atp2a2
Atp6v1d
Birc6
Bnip3l
Bod1
Brdt
Bri3
Brix1
Btf3
Btg4
C1qbp
Cab39
Calm1
Cbx1
Ccdc186
Cdc34
Cdr2
Cds1
Cenpe
Cenph
Cetn2
Cetn3
Cfl2
Chmp5
Cks1b
Cnot6l
Cop1
Copz1
Cox5a
Csnk2a2
Csnk2b
Cul3
Cwc15
Dazl
Dbi
Dcbld2
Dcun1d5
Denr
Dhx36
Diaph1
Dnajc21
Dppa3
Dstn
Dusp7
Dym
Dynll1
E2f5
Eapp
Eif1
Eif1ax
Eif1b
Eif3b
Eif3h
Eloc
Emc7
Eny2
Ergic2
Erh
Evi5
Exosc8
Ezh2
Fam193a
Fam92a
Fam98b
Fbxo11
Fbxo33
Foxo1
Frg1
Fth1
Fyn
Gabarapl2
Gatad2b
Gclm
Ggct
Gins1
Gkap1
Glrx
Gmnn
Gnai2
Gnl3
Gnpda2
Grsf1
Gsk3b
Gsta4
Gstm5
Gtf2a2
Gtf2b
Gtf2f2
Gtpbp4
H2az1
Hdac2
Herpud2
Hmga2
Hmgn3
Hnrnpa0
Hnrnpa2b1
Hnrnpab
Hnrnpd
Hnrnpu
Hnrnpul2
Hpf1
Hsp90aa1
Imp3
Iqgap2
Itga6
Kctd3
Kdm1a
Khdc1c
Khsrp
Kif2a
Kmt2c
Kras
Lactb2
Larp4
Lrrc28
Lsm1
Lsm12
Lsm2
Lyrm4
Maco1
Mael
Magoh
Mbl2
Mcmbp
Med30
Med31
Med6
Mepce
Mff
Mgat4a
Micos10
Mki67
Mob4
Mon2
Mphosph10
Mphosph8
Mrpl13
Mrpl40
Mrps14
Mrps25
mt-Co3
Mthfs
Mycbp
Mycbp2
Nasp
Ncoa6
Ndufa4
Ndufaf4
Ndufb9
Ndufs4
Nedd8
Nexn
Nf1
Npm2
Ntan1
Nucks1
Nufip2
Nup37
Ooep
Oosp1
Oosp3
Orc6
Ostc
Otud4
Otud5
Pabpn1
Paf1
Pan3
Pfdn1
Phax
Phf14
Phyhipl
Picalm
Pik3ca
Pkn2
Plekha3
Plekha8
Polb
Pole4
Polr1d
Ppia
Ppib
Ppil4
Ppm1a
Ppm1h
Ppp2ca
Ppp3cb
Ppp4r2
Ppwd1
Prdx1
Prkd1
Prpf38a
Prpf8
Prrc2c
Psip1
Psma1
Psma2
Psma6
Psmb2
Psmc6
Psmd14
Psmd6
Psme3
Psme4
Ptges3
Ptpn2
Rab12
Rab21
Rab22a
Rab2a
Rab5if
Ran
Ranbp1
Rbm25
Rbm26
Rbm3
Rbm33
Rcor1
Reps1
Rexo2
Rgs10
Rgs2
Rheb
Rif1
Rmnd5a
Rock1
Rock2
Rpa3
Rpl17
Sar1b
Sclt1
Sec11a
Sec22a
Sf3b6
Sfpq
Sfr1
Sirt1
Ska1
Slain1
Slc12a2
Smap2
Smc2
Smc6
Smim20
Smndc1
Snrnp27
Snrpb2
Snrpd1
Snu13
Sp110
Spcs1
Srp14
Srp19
Srpk1
Srrm1
Srsf2
Srsf7
Ssb
Stard3nl
Stxbp5
Sub1
Sumo1
Sumo2
Suz12
Tab3
Taf5
Taf7
Taf9
Taok1
Tbc1d13
Tcl1b1
Tdrd12
Tent4a
Timm17a
Timm9
Tipin
Tmco1
Tmed10
Tmem35b
Top1
Trappc2
Trim24
Trim33
Trim41
Triqk
Ube2c
Ube2e3
Ube2h
Ube2t
Ube2w
Ubfd1
Ubl5
Ubp1
Ubr3
Ubr5
Uchl3
Ugcg
Upf1
Usp16
Vapa
Vbp1
Vma21
Vps29
Wapl
Wbp4
Wdr26
Wdr61
Wnk1
Wtap
Ybx1
Ybx2
Ybx3
Ypel5
Ythdc1
Ywhaz
Zbtb18
Zc3h8
Zcchc10
Zfp91
Zmat2

## Sheet: crRNA sequence
		5'→3'
	Mettl3	CACAACTGCAAATTTGCCCAAGA
		CCCAGATGATTTCATCCACCCGT
		TCCTTAAATCCAAGTGCCCAGAG
	Mettl14	CTTTGCTATTTAACACAGCACCA
		AGATGTATCATAGGAAGCCCTGC
		AGTGTCTACAAAATGTTGGCAGT
	Mettl16	AAACACTTAAACAGGTAGCGTCC
		AAATCTGGATATTTAGATGCCAG
		GCATTGATTTGCTTAGAGCCATC
	Fto	CAGCATGAAATAGCAGTCTCCCT
		ACGTCCCGAAACAAGCAGCCATG
		TAAGATATAATCCAAGGTGCCTG
	Alkbh5	GACTCATAGGATTTGCGCCAATA
		CTGAAGAAAGACACGGACACGAT
		GAGTGATTTCATCAGCAGCATAC
	Ythdc1	CCTCATTCTCAGTGTTGTTGCCC
		AATTCATCATCCTGTTCTGGTAC
		CTCTCAGAACCATCTGGTGTAGG
	Ythdc2	GAAAAATTAATATTGCACCAGCA
		ATGCAGCTTTAACAACAGCCCAG
		CATCTCGAATGTCACCACCACCT
	Ythdf1	CCATCAACAACTGTGCCACCAAG
		CACTGTTGACAACTGAACCCACC
		CATGTTTACATTTGTCCCACCAT
	Ythdf2	CCACCCCATTATGACCGAACCCA
		CTTGCTAGCAATATCAGCCCAAG
		CATAAGAAGTTAGATAGGGCATG
	Ythdf3	CAGACTTCATTTCAGCCACTCCA
		CAATACTACTAATGCCAGGCACC
		ACAGACTTCATTTCAGCCACTCC

## Sheet: sgRNA sequence
		5'→3'
	Ythdc1	TGATTATGACACCCGAAGTG
		GCCAAGTCTCCTACACCAGA
		GGGCAACAACACTGAGAATG

## Sheet: qRT-PCR primers
	Mettl3-F	CTGGGCACTTGGATTTAAGGAA
	Mettl3-R	TGAGAGGTGGTGTAGCAACTT
	Mettl14-F	CTGAGAGTGCGGATAGCATTG
	Mettl14-R	GAGCAGATGTATCATAGGAAGCC
	Mettl16-F	TTGGAGAGACTAATTCCCACAGT
	Mettl16-R	TTTTGTCCGAATCCTGGTGAC
	Fto-F	TTCATGCTGGATGACCTCAATG
	Fto-R	GCCAACTGACAGCGTTCTAAG
	Alkbh5-F	CGCGGTCATCAACGACTACC
	Alkbh5-R	ATGGGCTTGAACTGGAACTTG
	Ythdc1-F	GTCCACATTGCCTGTAAATGAGA
	Ythdc1-R	GGAAGCACCCAGTGTATAGGA
	Ythdc2-F	ACCGACTAAGTCAATCTCTTGGT
	Ythdc2-R	AGGCTCCTAACAGCATGTTTTG
	Ythdf1-F	ACAGTTACCCCTCGATGAGTG
	Ythdf1-R	GGTAGTGAGATACGGGATGGGA
	Ythdf2-F	GAGCAGAGACCAAAAGGTCAAG
	Ythdf2-R	CTGTGGGCTCAAGTAAGGTTC
	Ythdf3-F	AACCAGGGGCATTAGGAAATACC
	Ythdf3-R	TCCACTTGTTCCCCATGTAGAG
	Actb-F	GGCTGTATTCCCCTCCATCG
	Actb-R	CCAGTTGGTAACAATGCCATGT
	Rab3b-F	ATGACATCGCCAACCAGGAGTC
	Rab3b-R	CGTTCGTCTTCCAGGTCACACT
	Ybx3-F	CAAGCGGCTAATGGTCCAAACC
	Ybx3-R	GTTCTCAGTTGGTGCTTCACCTG
	Commd3-F	GAGGCAGGAAAGCACCAAGTTG
	Commd3-R	CTGATACTCGGTGCAAAACAGTTC
	Camk1d-F	CCTACTGGGATGACATCTCCGA
	Camk1d-R	TTGCTAAGGGCTGTGTCACCAG
	Tceal8-F	CCATAGAGGAGAGCCTGCTGAA
	Tceal8-R	GCCTTTCCAACTCATCTACGCC
	Ccna2-F	GCACTACCATCCTTCTCAGGTG
	Ccna2-R	TGTGCTGCATGACTTCCAGGAC
	Eif5a-F	AGAGGACCTTCGTCTGCCTGAA
	Eif5a-R	TGTCATGGCAGACAGCACTGTG
	GFP-F	AAGGGCATCGACTTCAAGG
	GFP-R	TGCTTGTCGGCCATGATATAG
	mCherry-F	GAGGCTGAAGCTGAAGGAC
	mCherry-R	GATGGTGTAGTCCTCGTTGTG
